# Supplementary material for: Metal–organic framework transistors for dopamine sensing
Source: Royal Society of Chemistry journal article supplement (doi:10.1039/d1qm00118c), 2021-01-01
Supplement: d1qm00118c1.pdf [file d1qm00118c1.pdf]

## Supporting Information

### Metal-Organic Framework Transistors for Dopamine Sensing

Jiajun Song,<sup>†a</sup> Jianzhong Zheng,<sup>†a</sup> Anneng Yang,<sup>a</sup> Hong Liu,<sup>a</sup> Zeyu Zhao,<sup>a</sup> Naixiang Wang,<sup>a</sup>  
and Feng Yan<sup>\*a</sup>

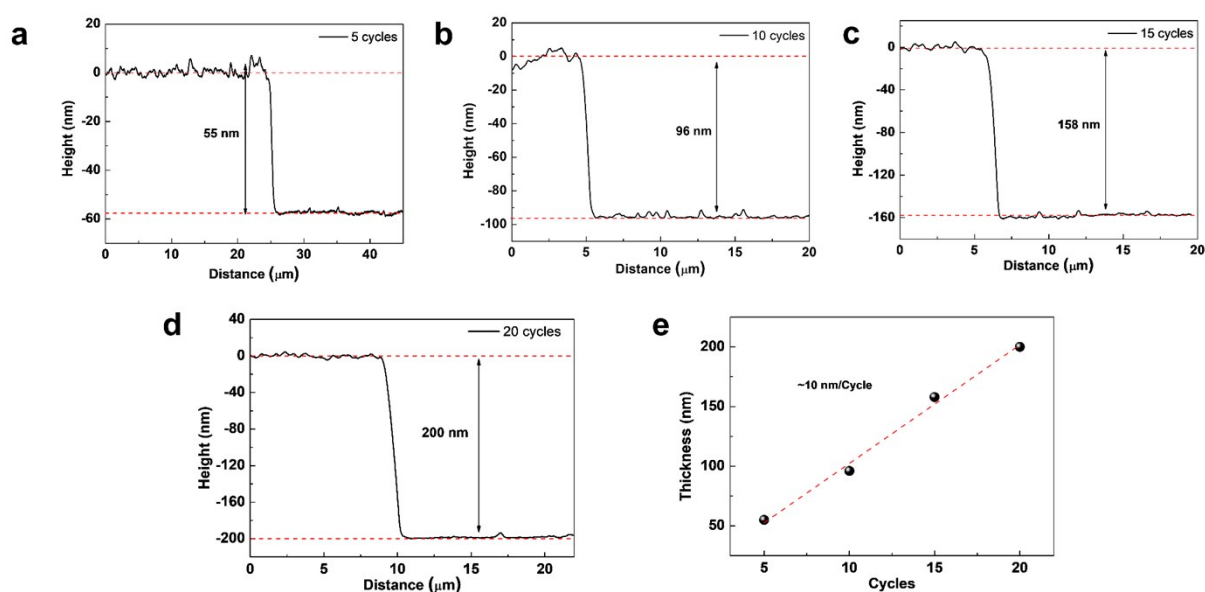

**Figure S1.** Thicknesses of  $\text{Cu}_3(\text{HHTP})_2$  films with different growth cycles: a) 5 cycles; b) 10 cycles; c) 15 cycles; d) 20 cycles, respectively, and e) the dependence of thickness on growth cycle.

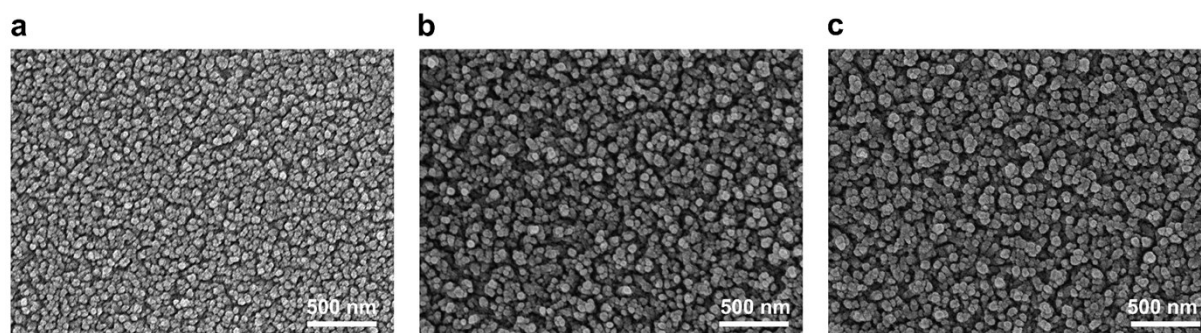

**Figure S2.** Top-view SEM images of  $\text{Cu}_3(\text{HHTP})_2$  films with different growth cycles: a) 5 cycles; b) 10 cycles; c) 20 cycles, respectively.

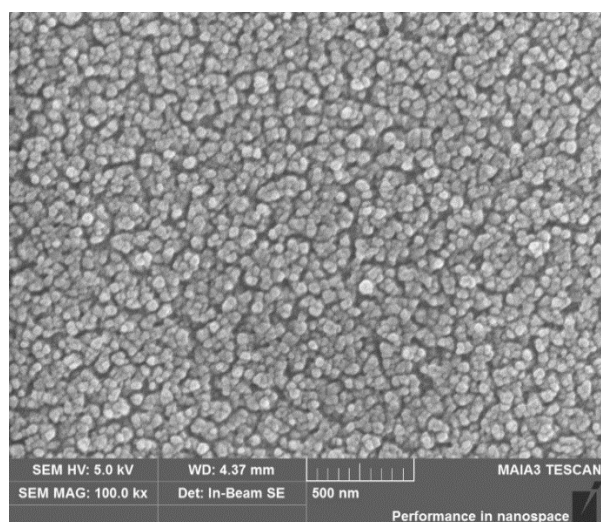

**Figure S3.** Top-view SEM image of a 15-cycle  $\text{Cu}_3(\text{HHTP})_2$  film on Au electrode.

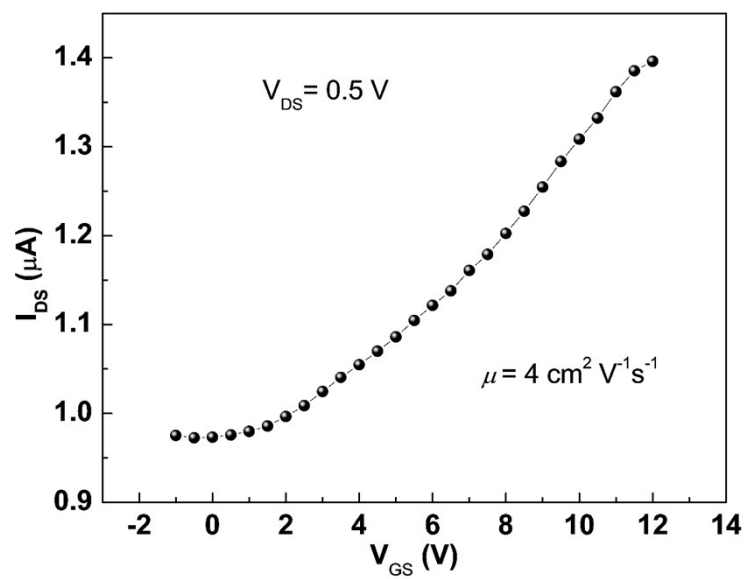

**Figure S4.** Transfer characteristic of a 15-cycles  $\text{Cu}_3(\text{HHTP})_2$  FET (channel width  $W = 0.4$  mm, channel length  $L = 0.2$  mm).

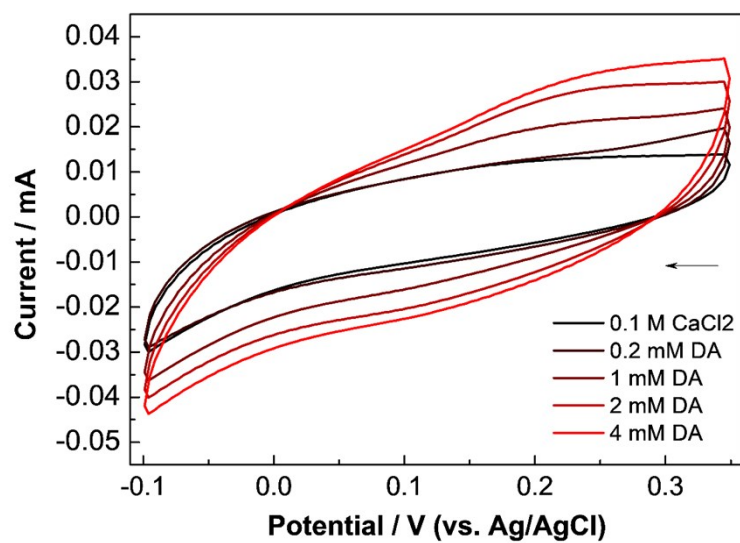

**Figure S5.** Cyclic voltammograms of a 15-cycles  $\text{Cu}_3(\text{HHTP})_2$  film in 0.1 M  $\text{CaCl}_2$  solution before and after the additions of DA with different concentrations. The scan rate is 50 mV/s.

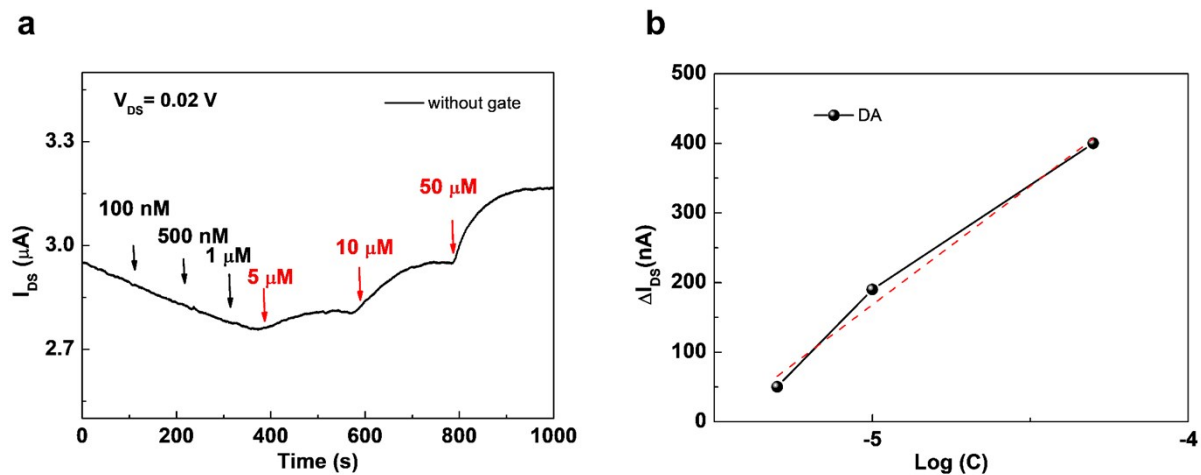

**Figure S6.** a) Real-time response of a  $\text{Cu}_3(\text{HHTP})_2$ -based chemiresistor (without gate) to additions of DA with a series of concentrations. b) Current change ( $\Delta I_{DS}$ ) as a function of DA concentration.

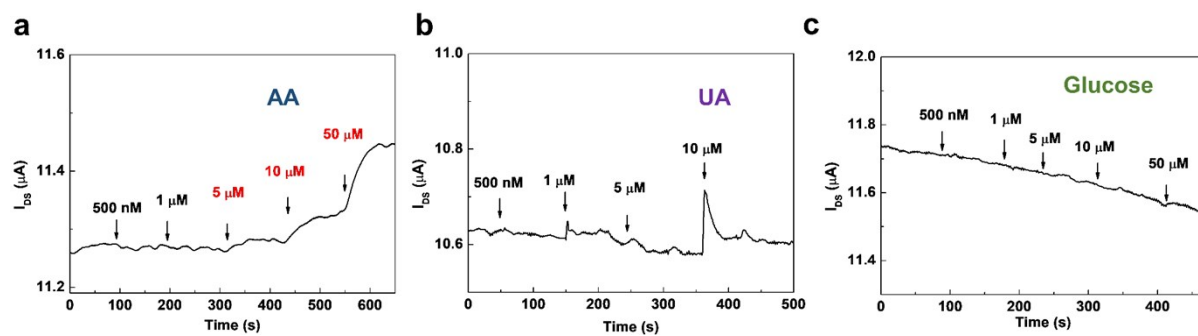

**Figure S7.** Real-time response ( $I_{DS} \sim \text{time}$ ,  $V_{DS} = 20 \text{ mV}$ ,  $V_{GS} = 40 \text{ mV}$ ) of  $\text{Cu}_3(\text{HHTP})_2$ -based SGMTs to additions of a) AA, b) UA and c) glucose with different concentrations.
